# Supplementary material
Source: PubMed Central journal article supplement (PMC3557098)
Supplement: 1208717110_pnas.201208717SI.pdf [file 1208717110_pnas.201208717SI.pdf]

# Supporting Information

Venkataraman et al. 10.1073/pnas.1208717110

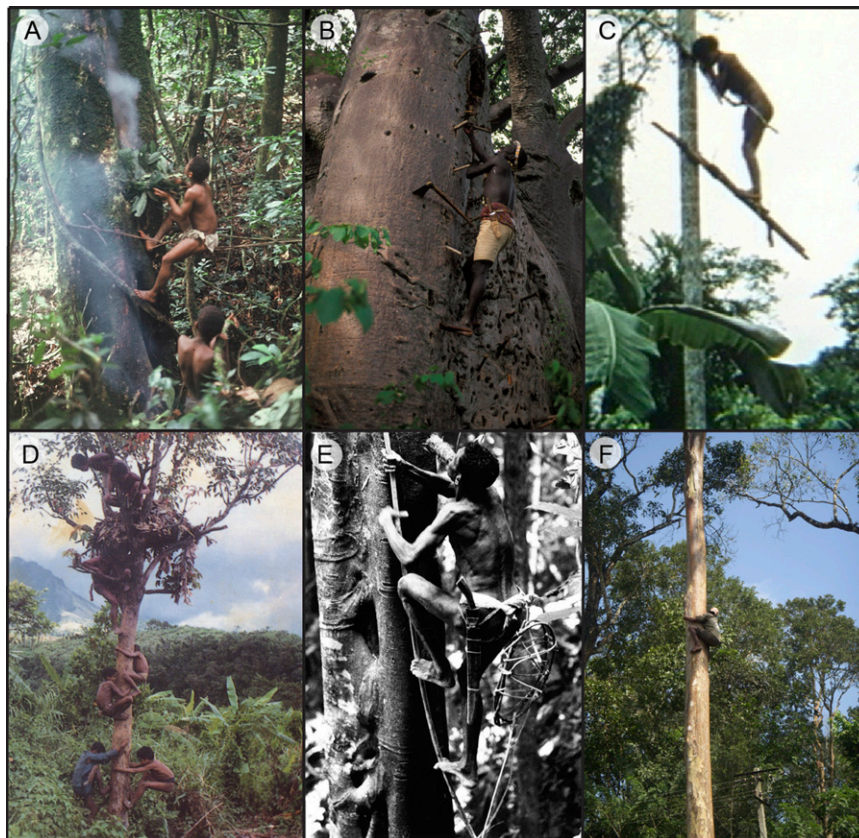

**Fig. S1.** Photographs of technology-assisted (A–C) and unassisted (D–F) tree climbing by hunter–gatherers. (A) An Mbuti man in the Ituri Forest, Democratic Republic of Congo, uses a rope harness to steady himself as he pacifies bees with smoke to access the honey and brood inside a low nest (photograph by Terese Hart; reproduced with permission from [www.bonoboincongo.com](http://www.bonoboincongo.com)). (B) A Hadza man in Tanzania climbs a baobab tree for honey by hammering pegs and cutting notches into the trunk (photograph by Ariadne Van Zandbergen; reproduced with permission). (C) A Yanomamö man in Venezuela uses two “A-frame” devices to access the fruit of a peach palm [still frame from the film *Climbing the Peach Palm* (1974) by Timothy Asch and Napoleon Chagnon; reproduced with permission from Documentary Educational Resources; ref. 1]. (D) Aeta children in the Philippines climb during play in a variety of styles (photograph by Carmen Balazo; reproduced with permission). (E) A Batak man ascends a small-diameter vine by grasping the substrate with his halluces (photograph by James Eder; reproduced with permission). (F) A Jenu Kuruba man in Southern India climbs a large-diameter tree with smooth bark by inverting his ankles and hugging the trunk (photograph by Kathryn Demps; reproduced with permission).

1. Asch T, Chagnon N (1974) *Climbing the peach palm* (Documentary Educational Resources, Watertown, MA).

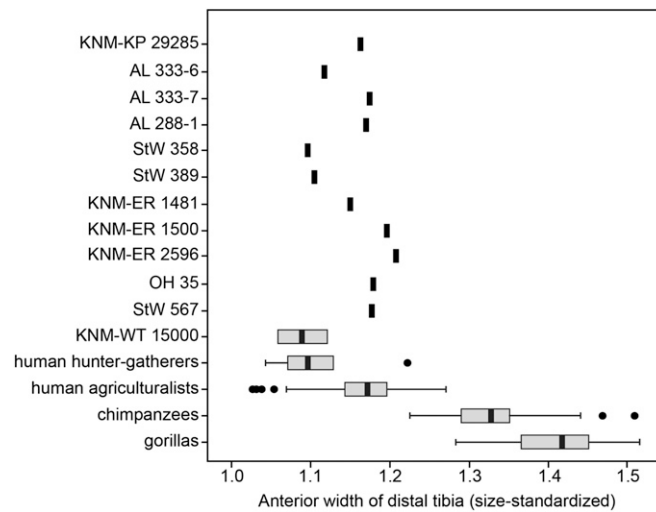

**Fig. 52.** Width of the anterior aspect of the distal tibia in human agriculturalists, African apes, and extinct hominins (reproduced and modified from ref. 1), with the addition of human hunter-gatherers ( $n = 6$ ) from the Ituri Forest, Democratic Republic of Congo. Boxplots show median (black bar), interquartile range (gray), and overall ranges (whiskers), with outliers (values greater than 1.5 times the interquartile range) represented by filled circles.

1. DeSilva JM (2009) Functional morphology of the ankle and the likelihood of climbing in early hominins. *Proc Natl Acad Sci USA* 106(16):6567–6572.

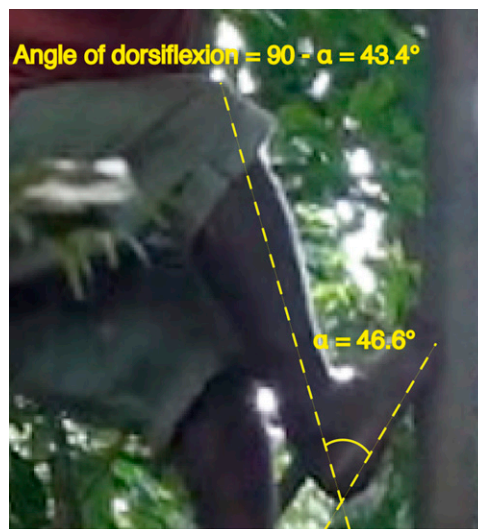

**Fig. 53.** An example image demonstrating the methods used to calculate angle of dorsiflexion at the ankle joint (*Materials and Methods*).

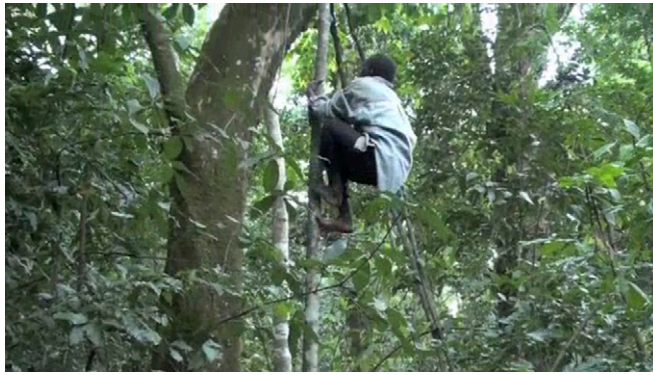

**Movie S1.** Recorded instance of a Twa man ascending a tree in the pursuit of honey.

[Movie S1](#)
